# Supplementary material for: Distribution of 3-Isobutyl-2-methoxypyrazine across Rachis Components of Vitis vinifera Shiraz and Cabernet Sauvignon
Source: Hindawi journal article supplement (doi:10.1155/2023/2428791), 2023-04-18
Supplement: f1 [file 2428791.f1.pdf]

## SUPPLEMENTARY MATERIALS FOR

### Distribution of 3-Isobutyl-2-methoxypyrazine across rachis components of *Vitis vinifera* Shiraz and Cabernet Sauvignon

Ross D. Sanders<sup>1,2,3</sup>, Paul K. Boss<sup>2,3</sup>, Dimitra L. Capone<sup>1,3</sup>, Catherine M. Kidman<sup>4</sup>, Emily L. Nicholson<sup>2</sup>, and David W. Jeffery<sup>1,3</sup>

<sup>1</sup>School of Agriculture, Food and Wine, and Waite Research Institute, The University of Adelaide, Waite Campus, PMB 1, Glen Osmond, South Australia 5064, Australia

<sup>2</sup>CSIRO Agriculture and Food, Waite Campus, Locked Bag No. 2, Glen Osmond, South Australia 5064, Australia

<sup>3</sup>Australian Research Council Training Centre for Innovative Wine Production, The University of Adelaide, Waite Campus, PMB 1, Glen Osmond, South Australia 5064, Australia

<sup>4</sup>Wynns Coonawarra Estate, Memorial Drive, Coonawarra, South Australia 5263, Australia

Correspondence should be addressed to David W. Jeffery; david.jeffery@adelaide.edu.au

#### Table of Contents

|                                                                                                                                                                                                                                                                                                                      | Page |
|----------------------------------------------------------------------------------------------------------------------------------------------------------------------------------------------------------------------------------------------------------------------------------------------------------------------|------|
| <b>Figure S1.</b> Overview of sampling methodology for Shiraz grapes from the Barossa Valley in the 2019/20 and 2020/21 seasons.                                                                                                                                                                                     | S-2  |
| <b>Figure S2.</b> Average weight (g) of rachis components from Shiraz bunches (n = 26) sampled at harvest in 2022 from Wrattenbully, South Australia.                                                                                                                                                                | S-3  |
| <b>Figure S3.</b> Estimated marginal means of IBMP (ng/kg of component $\pm$ SE) in the peduncle, top rachis, bottom rachis, and pedicel from Shiraz rachis sampled during the 2019/20 and 2021/22 vintages, considering the interaction effect between rootstock (own roots and Ramsey) and berry maturity.         | S-3  |
| <b>Figure S4.</b> Estimated marginal means of IBMP (ng/kg of component $\pm$ SE) in the peduncle, top rachis, bottom rachis, and pedicel of Shiraz rachis sampled during the 2019/20 and 2021/22 vintages considering a three-way interaction effect between component, vintage, and berry maturity.                 | S-4  |
| <b>Table S1.</b> Overview of rootstock, average degrees Brix at harvest, average winter rainfall, and climate class as determined according to the Huglin index for each viticultural region and season.                                                                                                             | S-4  |
| <b>Table S2.</b> Average leaf area index (LAI) values for Shiraz vines grown in the Barossa Valley over the 2020/21 season.                                                                                                                                                                                          | S-5  |
| <b>Table S3.</b> Average concentration of 3-isobutyl-2-methoxypyrazine (IBMP) (ng/kg $\pm$ SD) in different rachis components of Shiraz sampled from the Barossa Valley at flowering (80% cap fall), 50% veraison, and harvest in the 2019/20 and 2021/22 growing seasons.                                           | S-5  |
| <b>Table S4.</b> Average concentration (ng/kg $\pm$ SD) of 3-isobutyl-2-methoxypyrazine (IBMP), 3-isopropyl-2-methoxypyrazine (IPMP) and 3-sec-butyl-2-methoxypyrazine (SBMP) in different rachis components of Shiraz sampled at harvest in 2022 from control (ambient light) and box (light excluded) experiments. | S-6  |
| <b>Table S5.</b> Average concentration of 3-isobutyl-2-methoxypyrazine (IBMP) (mean $\pm$ SD) in rachis components at 80% veraison and harvest from Reynella and SA125 Cabernet Sauvignon clones grown in the Coonawarra over the 2019/20 growing season.                                                            | S-6  |

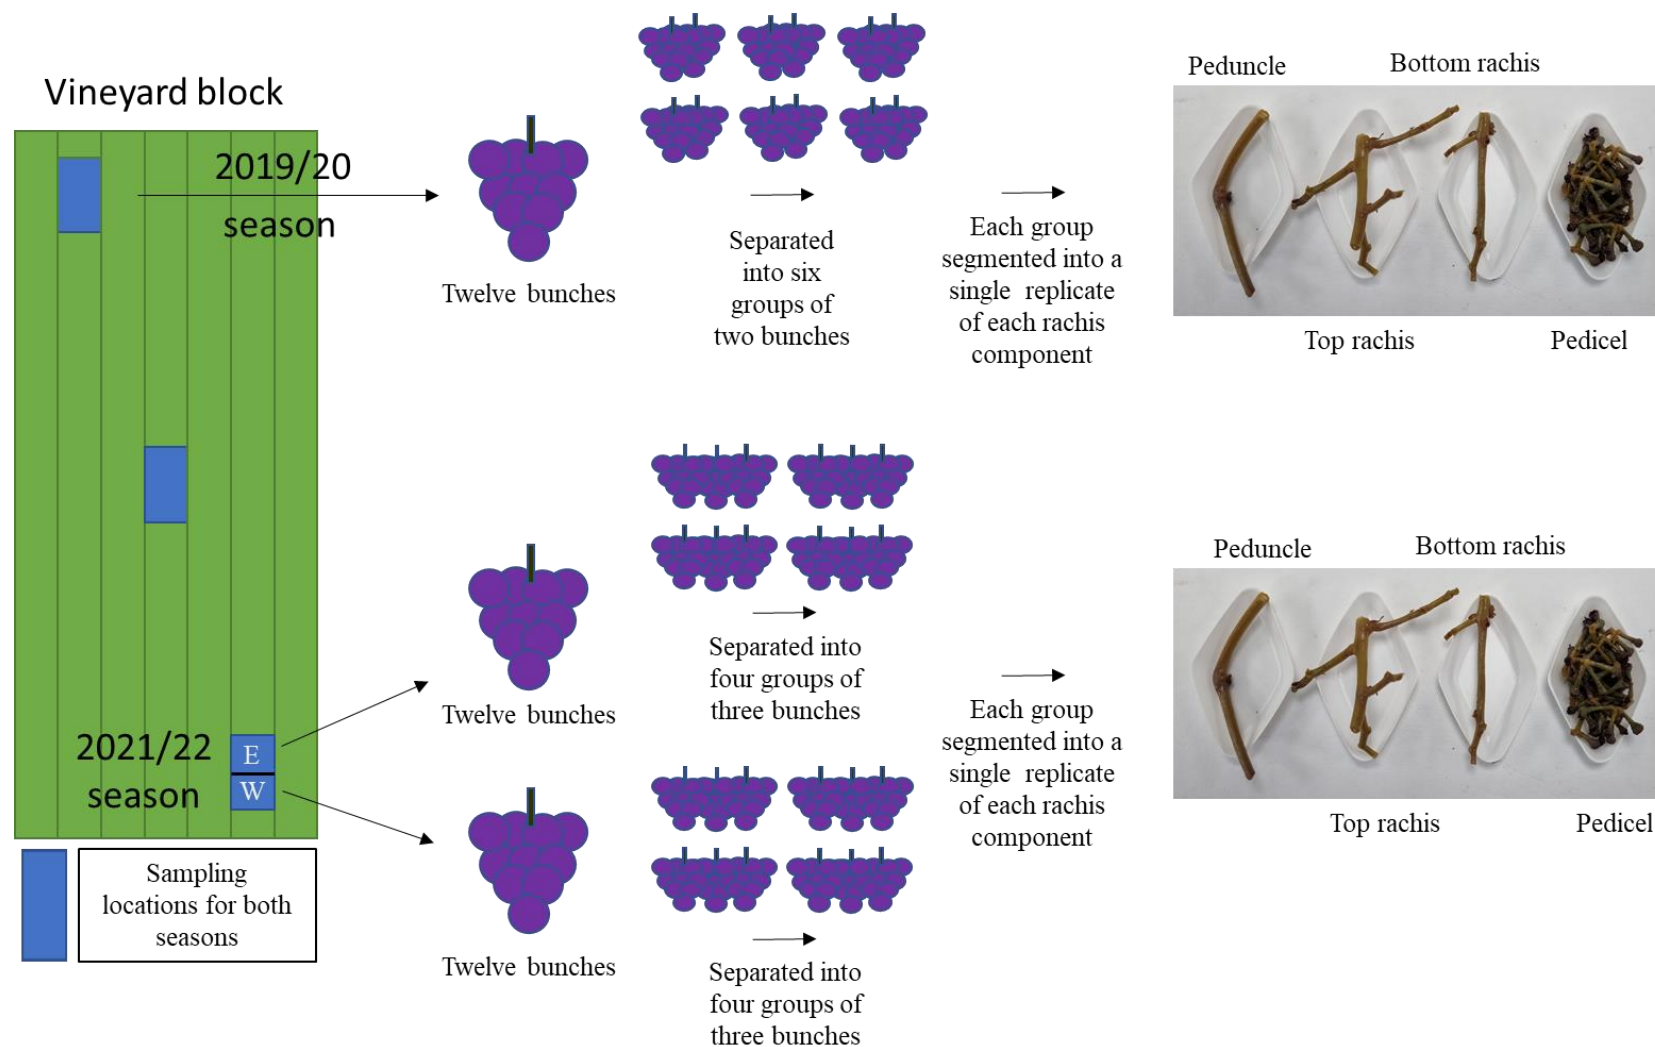

**Figure S1.** Overview of sampling methodology for Shiraz grapes from the Barossa Valley in the 2019/20 and 2020/21 seasons. At veraison and maturity in the 2019/20 growing season, twelve bunches were sampled from each location and separated into six groups of two bunches before being segmented into rachis components (peduncle, top rachis, bottom rachis, pedicel). At veraison and maturity in the 2020/21 growing season, twelve bunches were taken from each east (E) and west (W) sub-region in every sampling location before being separated into four groups of three bunches and segmented into rachis components. Note for both growing seasons, sample numbers were doubled at flowering due the small size of rachis at this phenological stage.

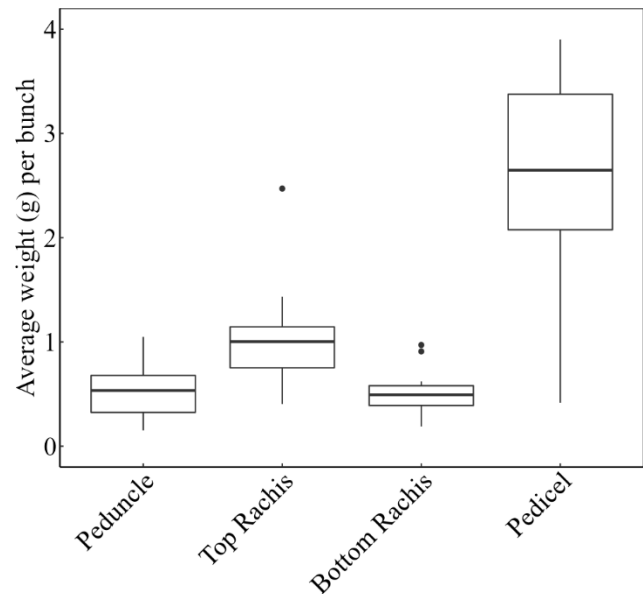

**Figure S2.** Average weight (g) of rachis components from Shiraz bunches (n = 26) sampled at harvest in 2022 from Wrattenbully, South Australia.

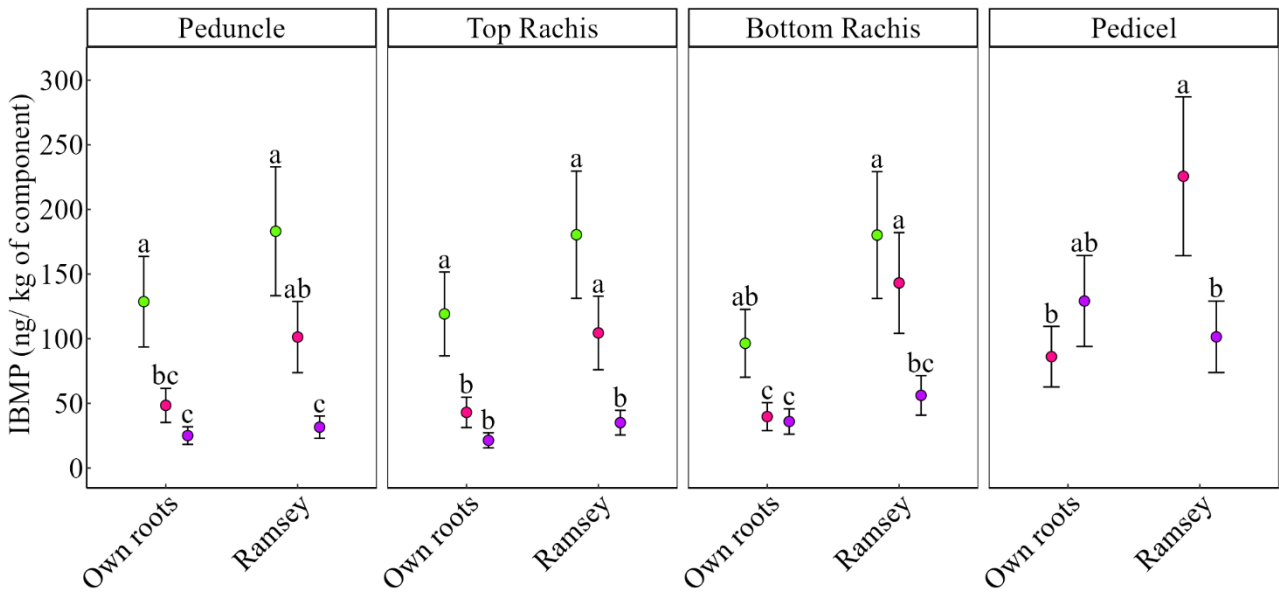

**Figure S3.** Estimated marginal means of IBMP (ng/kg of component  $\pm$  SE) in the peduncle, top rachis, bottom rachis, and pedicel from Shiraz rachis sampled during the 2019/20 and 2021/22 vintages, considering the interaction effect between rootstock (own roots and Ramsey) and berry maturity (flowering (• green), veraison (• red), and harvest (• purple)). Bars sharing the same letter within a component are not significantly different (linear mixed model,  $\alpha = 0.05$ , Bonferroni-adjusted). Note pedicel material was not sampled at flowering.

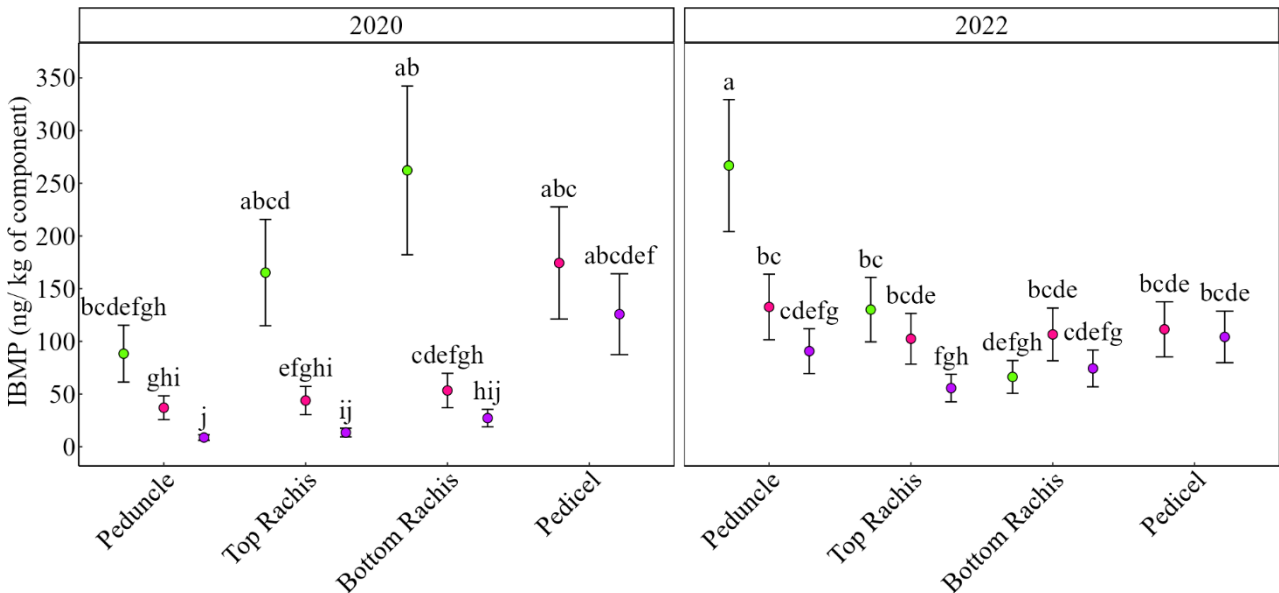

**Figure S4.** Estimated marginal means of IBMP (ng/kg of component  $\pm$  SE) in the peduncle, top rachis, bottom rachis, and pedicel of Shiraz rachis sampled during the 2019/20 and 2021/22 vintages at (flowering (• green), veraison (• red), and harvest (• purple)) considering a three-way interaction effect between component, vintage, and berry maturity. Bars sharing the same letter between the plots are not significantly different (linear mixed model,  $\alpha = 0.05$ , Bonferroni-adjusted). Note pedicel material was not sampled at flowering.

**Table S1.** Overview of rootstock, average degrees Brix at harvest, average winter rainfall, and climate class as determined according to the Huglin index for each viticultural region and season.

| Region         | Year    | Rootstock   | Average °Brix at harvest | Average winter rainfall (mm) <sup>†</sup> | Climate class (Huglin index) |
|----------------|---------|-------------|--------------------------|-------------------------------------------|------------------------------|
| Barossa Valley | 2019/20 | Own roots   | 28.2                     | 149                                       | Temperate warm (2379)        |
|                |         | Ramsey      | 26.0                     |                                           |                              |
|                | 2021/22 | Own roots   | 29.8                     | 151                                       | Temperate warm (2252)        |
|                |         | Ramsey      | 27.3                     |                                           |                              |
| Coonawarra     | 2019/20 | 110 Richter | 24.5                     | 234                                       | Temperate (1993)             |

<sup>†</sup> Average winter rainfall (June – August) was obtained using data from Australian BOM weather stations.

**Table S2.** Average leaf area index (LAI) values for Shiraz vines grown in the Barossa Valley over the 2020/21 season.

| Rootstock | Row | Sub-block <sup>†</sup> | LAI <sup>‡</sup> |
|-----------|-----|------------------------|------------------|
| Own roots | 42  | W                      | 2.40             |
|           |     | E                      | 3.20             |
|           | 45  | W                      | 3.19             |
|           |     | E                      | 3.97             |
|           | 48  | W                      | 3.07             |
|           |     | E                      | 3.92             |
| Ramsey    | 53  | W                      | 2.85             |
|           |     | E                      | 2.31             |
|           | 56  | W                      | 2.07             |
|           |     | E                      | 2.58             |
|           | 59  | W                      | 1.50             |
|           |     | E                      | 2.01             |

<sup>†</sup> Each sub-block consisting of six vines was divided into east (E) and west (W) regions. <sup>‡</sup> LAI was recorded on the 17<sup>th</sup> of January 2022 with a LICOR LAI-2200C Plant Canopy Analyser.

**Table S3.** Average concentration of 3-isobutyl-2-methoxypyrazine (IBMP) (ng/kg  $\pm$  SD) in different rachis components of Shiraz sampled from the Barossa Valley at flowering (80% cap fall), 50% veraison, and harvest in the 2019/20 and 2021/22 growing seasons.

| Component     | Rootstock | Flowering        |                 | Veraison        |                 | Harvest         |                 |
|---------------|-----------|------------------|-----------------|-----------------|-----------------|-----------------|-----------------|
|               |           | 2019/20          | 2021/22         | 2019/20         | 2021/22         | 2019/20         | 2021/22         |
| Peduncle      | Own roots | 70.3 $\pm$ 17.1  | 263 $\pm$ 105   | 47.8 $\pm$ 37.7 | 127 $\pm$ 85.6  | 20.0 $\pm$ 19.8 | 90.9 $\pm$ 56.0 |
|               | Ramsey    | 116 $\pm$ 17.0   | 305 $\pm$ 87    | 57.2 $\pm$ 7.47 | 207 $\pm$ 103   | 31.5 $\pm$ 32.7 | 141 $\pm$ 75.0  |
| Top Rachis    | Own roots | 150 $\pm$ 45.1   | 107 $\pm$ 42.2  | 56.7 $\pm$ 47.4 | 96.4 $\pm$ 65.3 | 34.5 $\pm$ 42.2 | 56.7 $\pm$ 59.2 |
|               | Ramsey    | 193 $\pm$ 34.9   | 180 $\pm$ 68.1  | 90.0 $\pm$ 52.1 | 179 $\pm$ 102   | 50.4 $\pm$ 53.3 | 126 $\pm$ 78.3  |
| Bottom Rachis | Own roots | 207 $\pm$ 72     | 50.3 $\pm$ 17.6 | 49.1 $\pm$ 35.2 | 93.3 $\pm$ 60.9 | 60.8 $\pm$ 60.9 | 57.4 $\pm$ 57.3 |
|               | Ramsey    | 359 $\pm$ 64.4   | 95.7 $\pm$ 28.9 | 154 $\pm$ 85.4  | 200 $\pm$ 118   | 121 $\pm$ 122   | 181 $\pm$ 114   |
| Pedicel       | Own roots | N/A <sup>†</sup> | N/A             | 169 $\pm$ 121   | 82.9 $\pm$ 39.8 | 231 $\pm$ 73.8  | 91.0 $\pm$ 47.8 |
|               | Ramsey    | N/A              | N/A             | 302 $\pm$ 34.7  | 187 $\pm$ 118   | 262 $\pm$ 253   | 159 $\pm$ 84.1  |

<sup>†</sup> N/A, samples were not collected at this time point

**Table S4.** Average concentration (ng/kg  $\pm$  SD) of 3-isobutyl-2-methoxypyrazine (IBMP), 3-isopropyl-2-methoxypyrazine (IPMP), and 3-*sec*-butyl-2-methoxypyrazine (SBMP) in different rachis components of Shiraz sampled from the Barossa Valley at harvest in 2022 from control (ambient light) and box (light excluded) experiments.

| Analyte | Rootstock | Peduncle        |                 | Top Rachis      |                 | Bottom Rachis   |                 | Pedicel         |                 |
|---------|-----------|-----------------|-----------------|-----------------|-----------------|-----------------|-----------------|-----------------|-----------------|
|         |           | Box             | Control         | Box             | Control         | Box             | Control         | Box             | Control         |
| IBMP    | Own roots | 416 $\pm$ 219   | 91.0 $\pm$ 56.0 | 666 $\pm$ 522   | 56.7 $\pm$ 59.2 | 878 $\pm$ 625   | 57.4 $\pm$ 57.3 | 811 $\pm$ 410   | 91.0 $\pm$ 47.8 |
|         |           | 614 $\pm$ 252   | 141 $\pm$ 75.0  | 1310 $\pm$ 493  | 126 $\pm$ 78.3  | 2320 $\pm$ 1160 | 181 $\pm$ 84.1  | 1260 $\pm$ 578  | 159 $\pm$ 84.1  |
|         | Ramsey    | nq <sup>†</sup> | nq              |
|         |           | 61.3 $\pm$ 53.4 | nq              | 64.6 $\pm$ 64.5 | nq              | 90.5 $\pm$ 95.7 | nq              | 72.8 $\pm$ 33.6 | nq              |
| SBMP    | Own roots | nq              |
|         |           | 40.7 $\pm$ 31.8 | nq              | 41.9 $\pm$ 34.2 | nq              | 44.2 $\pm$ 37.7 | nq              | 46.7 $\pm$ 16.8 | nq              |
|         | Ramsey    | nq              |
|         |           | nq              |

<sup>†</sup> nq, samples were below level of quantitation (LOQ). The LOQ values (ng/kg) were 0.44 for IBMP, 0.37 for IPMP, and 0.48 for SBMP.

**Table S5.** Average concentration of 3-isobutyl-2-methoxypyrazine (IBMP) (mean  $\pm$  SD) in rachis components at 80% veraison and harvest from Reynella and SA125 Cabernet Sauvignon clones grown in the Coonawarra over the 2019/20 growing season.

| Component     | Clone    | Veraison        | Harvest         |
|---------------|----------|-----------------|-----------------|
| Peduncle      | SA125    | 54.9 $\pm$ 12.7 | 35.8 $\pm$ 6.99 |
|               | Reynella | 70.9 $\pm$ 22.2 | 63.4 $\pm$ 18.3 |
| Top rachis    | SA125    | 175 $\pm$ 32.3  | 91.8 $\pm$ 22.4 |
|               | Reynella | 148 $\pm$ 33.5  | 111 $\pm$ 26.9  |
| Bottom rachis | SA125    | 211 $\pm$ 16.6  | 89.7 $\pm$ 37.1 |
|               | Reynella | 182 $\pm$ 72.4  | 133 $\pm$ 25.0  |
| Pedicel       | SA125    | 307 $\pm$ 66.7  | 174 $\pm$ 34    |
|               | Reynella | 259 $\pm$ 84.9  | 244 $\pm$ 119   |
